# Supplementary material for: Synthesis of novel nanotubular mesoporous nickel phosphates with high performance in epoxidation
Source: Royal Society of Chemistry journal article supplement (doi:10.1039/b805843a), 2008-01-01
Supplement: b805843a.pdf [file b805843a.pdf]

## Synthesis of novel nanotubular mesoporous nickel phosphates with high performance in epoxidation

Jing Yu,<sup>a</sup> Anjie Wang,<sup>\*a</sup> Juan Tan,<sup>\*a</sup> Xiang Li,<sup>a</sup> Jeroen Anton van Bokhoven<sup>b</sup> and Yong Kong Hu<sup>a</sup>

<sup>a</sup> State Key Laboratory of Fine Chemicals, Dalian University of Technology, 158 Zhongshan Road, Dalian 116012, P.R. China

<sup>b</sup> Institut für Chemie- und Bio-Ingenieurwissenschaften, ETH Zürich, Wolfgang-Pauli-Str. 10, 8093 Zürich, Switzerland

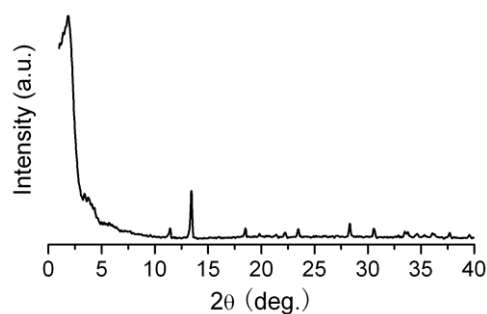

**Figure S1.** XRD pattern of mesoporous NiPO material synthesized in the presence of NaOH.

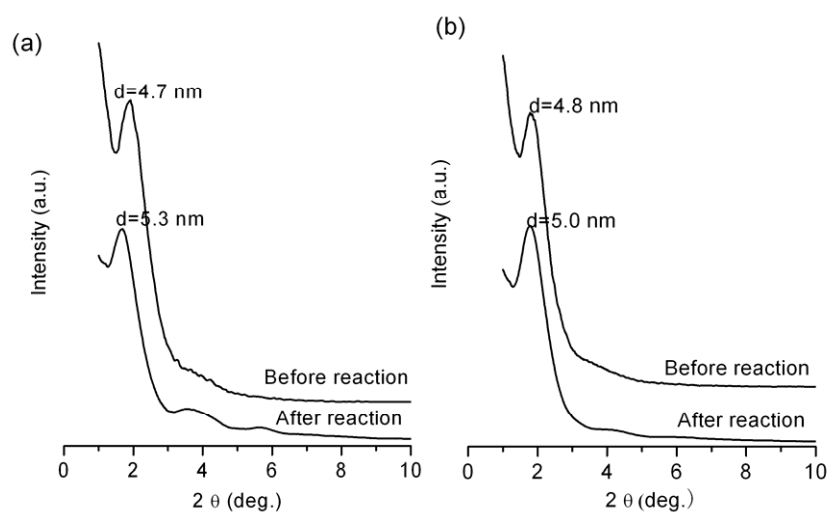

**Figure S2.** XRD patterns of mesoporous NiPO-1 (a) and NiPO-2 (b) materials before and after reaction in the epoxidation of cyclododecene.
